# Supplementary material
Source: PubMed Central journal article supplement (PMC4423181)
Supplement: cdd2014186x7.pdf [file cdd2014186x7.pdf]

**Supplementary Table S2. Gene differences and overlap between the 3 groups (scr, Plcy1 shRNA1, Plcy1 shRNA 2) analysed by gene expression profiling (364 probe sets).**

**Supplementary Table S3. Gene annotation of differentially methylated regions located in CGIs, CGI-shores and/or promoter regions identified by global methylome analysis in Plcy1-deficient cells at d0 and/or d1 compared to controls.**

**Supplementary Table S4. List of genes associated with each GO-term cluster identified by gene-ontology clustering using the DAVID functional annotation tool (<http://david.abcc.ncifcrf.gov/home.jsp>).**

**Supplementary Table S5: Primer sequences for validation of methylation status of 17 selected DMRs (Fig. 5b) using MassArray.**
