# Supplementary material
Source: PubMed Central journal article supplement (PMC4423181)
Supplement: cdd2014186x8.pdf [file cdd2014186x8.pdf]

| Probe set    | Gene symbol        | Description                                  | Geom mean of intensities in class 1 (scr) | Geom mean of intensities in class 2 (sh) | Fold-change | Parametric p-value |
|--------------|--------------------|----------------------------------------------|-------------------------------------------|------------------------------------------|-------------|--------------------|
| 1417481_at   | Ramp1              | receptor (calcitonin) activity modifying pr  | 8.9465239                                 | 45.0956149                               | 0.1983901   | 0.000106           |
| 1422638_s_at | Rassf5             | Ras association (RalGDS/AF-6) domain fam     | 40.9480584                                | 109.611519                               | 0.3735744   | 0.0000535          |
| 1448883_at   | Lgmn               | legumain                                     | 34.1044636                                | 12.9110323                               | 2.6414978   | 0.0000958          |
| 1449175_at   | Gpr65              | G-protein coupled receptor 65                | 29.9402745                                | 5.7235706                                | 5.2310483   | 0.0001147          |
| 1451601_a_at | Spns2              | spinster homolog 2 (Drosophila)              | 11.7362665                                | 34.6985599                               | 0.338235    | 0.0001474          |
| 1426716_at   | Tdrd7              | tudor domain containing 7                    | 4.8954604                                 | 11.6183068                               | 0.4213575   | 0.0001515          |
| 1416335_at   | Mif                | macrophage migration inhibitory factor       | 3448.993754                               | 1454.722139                              | 2.3708952   | 0.0001674          |
| 1448681_at   | Il15ra             | interleukin 15 receptor, alpha chain         | 11.0458965                                | 25.7629657                               | 0.428751    | 0.0002323          |
| 1444350_at   | Sifn10             | schlafen 10                                  | 6.4240882                                 | 15.6803294                               | 0.4096909   | 0.0002453          |
| 1436419_a_at | 1700097N02Rik      | RIKEN cDNA 1700097N02 gene                   | 27.3641878                                | 58.9617788                               | 0.4641004   | 0.0002752          |
| 1429065_at   | 1200009F10Rik      | RIKEN cDNA 1200009F10 gene                   | 7.1905274                                 | 18.4128404                               | 0.390517    | 0.000338           |
| 1436902_x_at | Tmsb10             | thymosin, beta 10                            | 5.4762029                                 | 15.4461178                               | 0.3545359   | 0.0003532          |
| 1452969_at   | Atp2b1             | ATPase, Ca++ transporting, plasma memb       | 59.9792617                                | 22.8967475                               | 2.6195538   | 0.0003543          |
| 1459668_at   | NA                 | NA                                           | 3.1877389                                 | 1.5686552                                | 2.0321476   | 0.0003611          |
| 1431591_s_at | G77168             | predicted gene, G77168                       | 6.4682015                                 | 14.1425019                               | 0.4573591   | 0.0003775          |
| 1428643_at   | Mgat5              | mannoside acetylglucosaminyltransferase      | 6.7286523                                 | 13.0793482                               | 0.5144486   | 0.000402           |
| 1416062_at   | Tbc1d15            | TBC1 domain family, member 15                | 61.9753487                                | 22.6005878                               | 2.7422007   | 0.0005187          |
| 1427347_s_at | Tubb2a             | tubulin, beta 2A                             | 15.9800808                                | 32.7132108                               | 0.4884901   | 0.0005525          |
| 1416041_at   | Sgk1               | serum/glucocorticoid regulated kinase 1      | 78.3947054                                | 21.3822481                               | 3.6663453   | 0.0005984          |
| 1441722_at   | NA                 | NA                                           | 36.2999159                                | 16.8051253                               | 2.1600503   | 0.0006219          |
| 1454711_at   | Trio               | triple functional domain (PTPR) interactir   | 9.8087945                                 | 29.5399465                               | 0.3320573   | 0.0006785          |
| 1440878_at   | Runx1              | run related transcription factor 1           | 21.8234179                                | 41.5504979                               | 0.5252264   | 0.0007376          |
| 1434290_at   | Gtdc1              | glycosyltransferase-like domain containin    | 24.8098582                                | 11.0557984                               | 2.2440585   | 0.0007491          |
| 1455451_at   | Ai449310           | expressed sequence Ai449310                  | 1.5228523                                 | 3.181579                                 | 0.4786467   | 0.0007785          |
| 1456433_at   | H2afy2             | H2A histone family, member Y2                | 11.8012566                                | 7.1275733                                | 1.6557187   | 0.0007803          |
| 1452425_at   | Tnfrsf14           | tumor necrosis factor receptor superfam      | 10.6452953                                | 28.5769695                               | 0.3725131   | 0.0008023          |
| 1435043_at   | Plcb1              | phospholipase C, beta 1                      | 10.8386306                                | 20.5197238                               | 0.5282055   | 0.0008332          |
| 1451796_s_at | Hdc                | histidine decarboxylase                      | 210.6365107                               | 54.8580442                               | 3.839665    | 0.0008497          |
| 1453024_at   | Wdr37              | WD repeat domain 37                          | 15.8843998                                | 7.8433404                                | 2.0252085   | 0.0008846          |
| 1438816_at   | Ahct1              | AT hook containing transcription factor 1    | 27.9940825                                | 12.4321043                               | 2.2517574   | 0.0008915          |
| 1427004_at   | Fbxo2              | F-box protein 2                              | 4.2691898                                 | 9.8427603                                | 0.4337391   | 0.0009154          |
| 1453000_at   | Camsap11           | calmodulin regulated spectrin-associated     | 43.779548                                 | 19.9253029                               | 2.1971836   | 0.0009447          |
| 1437862_at   | Rbm25              | RNA binding motif protein 25                 | 110.7580594                               | 52.7412815                               | 2.1002529   | 0.0009481          |
| 1443049_at   | Tmem19             | transmembrane protein 19                     | 17.8792469                                | 5.6191115                                | 3.1818637   | 0.0009894          |
| 1441769_at   | NA                 | NA                                           | 35.2196465                                | 17.1430162                               | 2.0544603   | 0.001012           |
| 1418655_at   | B4galnt1           | beta-1,4-N-acetyl-galactosaminyl transfer    | 51.9530311                                | 30.042936                                | 1.7292927   | 0.0010484          |
| 1428475_at   | Llph               | LLP homolog, long-term synaptic facilitat    | 440.4731738                               | 169.1834179                              | 2.6035245   | 0.0010581          |
| 1420112_at   | NA                 | NA                                           | 24.939557                                 | 9.7102735                                | 2.5683681   | 0.0010674          |
| 1451357_at   | Mpnd               | MPN domain containing                        | 36.4585002                                | 16.828913                                | 2.1664232   | 0.0010895          |
| 1428937_at   | Atp2b1             | ATPase, Ca++ transporting, plasma memb       | 89.8813236                                | 48.4203089                               | 1.8562732   | 0.0010908          |
| 1442212_at   | Cpd                | carboxypeptidase D                           | 15.3738545                                | 6.6325963                                | 2.317924    | 0.0012346          |
| 1435285_at   | Mppd2              | metallophosphoesterase domain contain        | 22.6095994                                | 12.7979881                               | 1.7663682   | 0.0013494          |
| 1460672_at   | 2410002F23Rik      | RIKEN cDNA 2410002F23 gene                   | 86.4659289                                | 51.0712488                               | 1.6930451   | 0.0013706          |
| 1439488_at   | Dot1l              | DOT1-like, histone H3 methyltransferase      | 13.9458724                                | 24.4655848                               | 0.57002     | 0.0013718          |
| 1447693_s_at | Neo1               | neogenin                                     | 10.141373                                 | 3.4052853                                | 2.9781273   | 0.0013777          |
| 1456933_at   | NA                 | NA                                           | 19.3601851                                | 9.1068454                                | 2.1258937   | 0.0014996          |
| 1460167_at   | Aldh7a1            | aldehyde dehydrogenase family 7, memb        | 10.7917166                                | 6.4643318                                | 1.6694197   | 0.0016123          |
| 1455692_x_at | 1700097N02Rik      | RIKEN cDNA 1700097N02 gene                   | 35.123718                                 | 61.1016049                               | 0.5748412   | 0.0016346          |
| 1454713_s_at | Hdc                | histidine decarboxylase                      | 541.4633757                               | 163.3128286                              | 3.3154981   | 0.0017             |
| 1416060_at   | Tbc1d15            | TBC1 domain family, member 15                | 343.1910815                               | 112.1425179                              | 3.0603119   | 0.0017312          |
| 1444343_at   | A130064L14Rik      | RIKEN cDNA A130064L14 gene                   | 17.8885168                                | 9.7500336                                | 1.8347134   | 0.0017463          |
| 1420930_s_at | Ctnnbl1            | catenin (cadherin associated protein), alp   | 12.6373125                                | 25.8387979                               | 0.4890828   | 0.001762           |
| 1435158_at   | C430048L16Rik      | RIKEN cDNA C430048L16 gene                   | 2.2609253                                 | 3.713984                                 | 0.5942205   | 0.0017701          |
| 1418300_a_at | Mknk2              | MAP kinase-interacting serine/threonine      | 201.0036302                               | 398.1699156                              | 0.5048187   | 0.0017928          |
| 1435740_at   | ENSMUSG00000072684 | predicted gene, ENSMUSG00000072684           | 22.7268633                                | 52.7300826                               | 0.4310037   | 0.0018257          |
| 1427038_at   | Penk1              | preproenkephalin 1                           | 37.9099699                                | 111.4741019                              | 0.3400787   | 0.0018413          |
| 1416996_at   | Tbc1d8             | TBC1 domain family, member 8                 | 13.4595766                                | 3.5005118                                | 3.8450311   | 0.0018649          |
| 1426987_at   | 5430417L22Rik      | RIKEN cDNA 5430417L22 gene                   | 14.9258313                                | 30.628243                                | 0.4873225   | 0.0019578          |
| 1441535_at   | Mllt3              | myeloid/lymphoid or mixed-lineage leuke      | 12.1159317                                | 20.015986                                | 0.6053128   | 0.0020325          |
| 1416556_at   | Tspan31            | tetraspanin 31                               | 430.9004185                               | 224.743778                               | 1.9172963   | 0.0020483          |
| 1422864_at   | Runx1              | run related transcription factor 1           | 82.7991677                                | 157.0740149                              | 0.5271347   | 0.0021078          |
| 1421889_a_at | Aplp2              | amyloid beta (A4) precursor-like protein 2   | 44.6296369                                | 23.3595355                               | 1.9105533   | 0.0022103          |
| 1446550_at   | Gsp1               | G1 to S phase transition 1                   | 9.4086474                                 | 5.1844418                                | 1.814785    | 0.0022648          |
| 1456204_at   | 2010107H07Rik      | RIKEN cDNA 2010107H07 gene                   | 252.945657                                | 410.7348579                              | 0.6158368   | 0.0023448          |
| 1419186_a_at | S8sia4             | ST8 alpha-N-acetyl-neuraminidase alpha-2,    | 54.7340828                                | 23.3495393                               | 2.3441183   | 0.00242            |
| 1439251_at   | 100042616          | predicted gene, 100042616                    | 11.8556666                                | 19.8554626                               | 0.5970985   | 0.0024319          |
| 1426974_at   | Os9                | amplified in osteosarcoma                    | 89.7934029                                | 52.984651                                | 1.6947059   | 0.0025557          |
| 1433745_at   | Trio               | triple functional domain (PTPR) interactir   | 11.2077511                                | 25.2135142                               | 0.4445136   | 0.0025601          |
| 1449221_a_at | Rrbp1              | ribosome binding protein 1                   | 54.957123                                 | 33.2444708                               | 1.6531207   | 0.0026152          |
| 1440559_at   | Hmga2-ps1          | high mobility group AT-hook 2, pseudoge      | 22.5894119                                | 41.2248891                               | 0.5479557   | 0.0028738          |
| 1422397_a_at | Il15ra             | interleukin 15 receptor, alpha chain         | 4.4121439                                 | 8.422686                                 | 0.5238405   | 0.0029615          |
| 1436991_x_at | Gsn                | gelsolin                                     | 2.0675238                                 | 4.0765158                                | 0.5071792   | 0.0030745          |
| 1423785_at   | Egln1              | EGln nine homolog 1 (C. elegans)             | 72.3204983                                | 44.8029787                               | 1.6141895   | 0.0030885          |
| 1450379_at   | Msn                | moesin                                       | 14.0255311                                | 8.0992565                                | 1.731706    | 0.0031184          |
| 1423321_at   | Myadm              | myeloid-associated differentiation marke     | 47.8074026                                | 29.1283627                               | 1.6412664   | 0.0031939          |
| 1425524_at   | Rbm25              | RNA binding motif protein 25                 | 9.7920648                                 | 5.9627429                                | 1.6422081   | 0.0032237          |
| 1438929_at   | NA                 | NA                                           | 24.9744863                                | 13.051264                                | 1.9135684   | 0.0032425          |
| 1448729_a_at | Sept4              | septin 4                                     | 2.292906                                  | 3.4678088                                | 0.6428528   | 0.0033358          |
| 1455452_x_at | Ai449310           | expressed sequence Ai449310                  | 2.4409413                                 | 7.3801289                                | 0.3307451   | 0.003406           |
| 1441315_s_at | Slc19a2            | solute carrier family 19 (thiamine transpo   | 15.4818126                                | 6.6486898                                | 1.6045508   | 0.0036224          |
| 1417856_at   | Relb               | avian reticuloendotheliosis viral (v-rel) on | 10.4849057                                | 4.4870079                                | 2.3367255   | 0.0038204          |
| 1449437_at   | D6Wsu163e          | DNA segment, Chr 6, Wayne State Univ         | 26.5497934                                | 42.4751367                               | 0.6250667   | 0.0038432          |
| 1425895_a_at | Id1                | inhibitor of DNA binding 1                   | 106.5923438                               | 64.5587321                               | 1.651091    | 0.0038566          |
| 1456840_at   | NA                 | NA                                           | 12.3499568                                | 7.4453887                                | 1.658739    | 0.003921           |
| 1439998_at   | Jmjd1c             | jumonji domain containing 1C                 | 5.1213528                                 | 10.0938274                               | 0.5073747   | 0.0039219          |
| 1432273_a_at | Darc               | Duffy blood group, chemokine receptor        | 11.3681048                                | 19.8151011                               | 0.5737092   | 0.0039264          |
| 1442077_at   | 2310076G05Rik      | RIKEN cDNA 2310076G05 gene                   | 13.5286258                                | 5.3457621                                | 2.5307198   | 0.0039397          |
| 1439482_at   | Uhrf1bp1           | UHRF1 (ICBP90) binding protein 1             | 41.4617117                                | 69.9570459                               | 0.5926738   | 0.0039435          |
| 1444232_at   | Prkg1              | protein kinase, cGMP-dependent, type I       | 4.9950506                                 | 8.9410647                                | 0.558664    | 0.0039947          |
| 1430029_a_at | Tspan31            | tetraspanin 31                               | 254.6225439                               | 137.003071                               | 1.8585171   | 0.0040532          |
| 1455854_a_at | Ssh1               | slingshot homolog 1 (Drosophila)             | 12.0610949                                | 26.5708271                               | 0.4593224   | 0.0040766          |
| 1439389_s_at | Myadm              | myeloid-associated differentiation marke     | 139.5932252                               | 88.1278823                               | 1.589848    | 0.0041154          |
| 1429219_at   | 1200009F10Rik      | RIKEN cDNA 1200009F10 gene                   | 5.6360073                                 | 9.5395342                                | 0.5910278   | 0.0042416          |
| 1417110_at   | Man1a              | mannosidase 1, alpha                         | 36.5600377                                | 24.1181239                               | 1.515874    | 0.004322           |
| 1440263_at   | Nrp                | neural regeneration protein                  | 47.6396516                                | 27.4125953                               | 1.7378745   | 0.0045247          |
| 1417749_a_at | Tjp1               | tight junction protein 1                     | 161.2208545                               | 65.7082009                               | 2.453588    | 0.0047199          |
| 1416743_at   | Uap1               | UDP-N-acetylglucosamine pyrophosphory        | 86.9784841                                | 56.2047503                               | 1.5475291   | 0.0048251          |
| 1434380_at   | Gbp6               | guanylate binding protein 6                  | 81.8865624                                | 131.0788859                              | 0.6247121   | 0.0052299          |
| 1457687_at   | Bcl2               | B-cell leukemia/lymphoma 2                   | 25.4610522                                | 46.4065733                               | 0.5486518   | 0.0053455          |
| 1428010_at   | Timm9              | translocase of inner mitochondrial memb      | 19.6229407                                | 10.9625265                               | 1.7900017   | 0.0053584          |
| 1433751_at   | Slc39a10           | solute carrier family 39 (zinc transporter)  | 103.6210476                               | 56.7457927                               | 1.8260569   | 0.0053847          |
| 1457480_at   | NA                 | NA                                           | 17.9194243                                | 27.2576496                               | 0.657409    | 0.0055151          |
| 1418181_at   | Ptp4a3             | protein tyrosine phosphatase 4a3             | 23.8461042                                | 44.5503475                               | 0.5352619   | 0.0056435          |
| 1440332_at   | Cdv3               | carnitine deficiency-associated gene expr    | 15.6805834                                | 10.0844395                               | 1.5549286   | 0.0056933          |
| 1434658_at   | 3110056O03Rik      | RIKEN cDNA 3110056O03 gene                   | 47.1637041                                | 77.366702                                | 0.6096124   | 0.005694           |
| 1423746_at   | Txndc5             | thioredoxin domain containing 5              | 47.6379905                                | 26.6771407                               | 1.7857233   | 0.0057686          |
| 1451566_at   | Zfp810             | zinc finger protein 810                      | 9.87264                                   | 5.9961837                                | 1.6464873   | 0.0058065          |
| 1437180_at   | Snrnp48            | small nuclear ribonucleoprotein 48 (U11/     | 59.1069769                                | 29.7086532                               | 1.9895542   | 0.0058136          |
| 1437441_at   | AA388235           | expressed sequence AA388235                  | 6.1802738                                 | 9.4974258                                | 0.6507315   | 0.0059562          |
| 1455508_at   | A530082C11Rik      | RIKEN cDNA A530082C11 gene                   | 91.4970228                                | 145.8150831                              | 0.6274867   | 0.0061031          |
| 1419406_a_at | Bcl11a             | B-cell CLL/lymphoma 11A (zinc finger pro     | 100.6417756                               | 162.8445683                              | 0.6180235   | 0.006125           |
| 1436476_at   | Dand5              | DAN domain family, member 5                  | 6.2844477                                 | 9.1625886                                | 0.6858813   | 0.006328           |
| 1417964_at   | Ap3d1              | adaptor-related protein complex 3, delta     | 43.4330545                                | 66.0411497                               | 0.6576665   | 0.0063464          |
| 1416614_at   | Eid1               | EP300 interacting inhibitor of differentiat  | 92.7666681                                | 138.5175056                              | 0.6697108   | 0.0063774          |

|              |               |                                                                   |             |             |           |           |
|--------------|---------------|-------------------------------------------------------------------|-------------|-------------|-----------|-----------|
| 1427540_at   | Zwint         | ZW10 interactor                                                   | 56.1977473  | 16.9492727  | 3.3156436 | 0.0065252 |
| 1435291_at   | Lemd3         | LEM domain containing 3                                           | 87.2692518  | 56.6380977  | 1.5408224 | 0.0066162 |
| 1457279_at   | NA            | NA                                                                | 7.963788    | 13.4675075  | 0.5913335 | 0.0066262 |
| 1442302_at   | Mpg           | N-methylpurine-DNA glycosylase                                    | 3.7811786   | 6.0499765   | 0.6253212 | 0.0067902 |
| 1418619_at   | Icam5         | intercellular adhesion molecule 5, telencephalon                  | 8.5858333   | 12.8986118  | 0.6656401 | 0.0070513 |
| 1447655_x_at | Sox6          | SRY-box containing gene 6                                         | 18.8758268  | 34.3877815  | 0.5489109 | 0.0072483 |
| 1430491_at   | Bop1          | block of proliferation 1                                          | 20.9124933  | 12.6996572  | 1.6466975 | 0.0073135 |
| 1424720_at   | Mgat4b        | mannoside acetylglucosaminyltransferase 4b                        | 25.0918765  | 50.8376592  | 0.4935687 | 0.0073567 |
| 1443858_at   | EG667823      | predicted gene, EG667823                                          | 113.8318885 | 166.3503216 | 0.6842902 | 0.0075884 |
| 1448863_a_at | Tnfrsf1       | tumor necrosis factor, alpha-induced protein 1                    | 16.973624   | 11.448824   | 1.4825648 | 0.0076096 |
| 1440203_at   | NA            | NA                                                                | 8.0262279   | 14.4132616  | 0.5568641 | 0.0076945 |
| 1453028_at   | Pwwp2a        | PWWP domain containing 2A                                         | 45.6628044  | 29.5270242  | 1.546475  | 0.0077117 |
| 1438040_a_at | Hsp90b1       | heat shock protein 90, beta (Grp94), member 1                     | 315.1018711 | 178.6127421 | 1.7641623 | 0.0079355 |
| 1440841_at   | NA            | NA                                                                | 22.3616759  | 13.5320793  | 1.6524937 | 0.0082055 |
| 1456312_x_at | Gsn           | gelsolin                                                          | 1.9350418   | 2.8361747   | 0.6822717 | 0.0083662 |
| 1457765_at   | NA            | NA                                                                | 3.8008247   | 2.4440323   | 1.555145  | 0.008422  |
| 1420370_s_at | Csn2          | casein beta                                                       | 104.1689454 | 13.6719103  | 7.6191946 | 0.008501  |
| 1439097_at   | NA            | NA                                                                | 14.9833379  | 9.3463049   | 1.6031296 | 0.0086007 |
| 1435676_at   | Cep164        | centrosomal protein 164                                           | 32.0145567  | 51.4958817  | 0.6216916 | 0.0086166 |
| 1419398_a_at | Reep5         | receptor accessory protein 5                                      | 147.6583915 | 218.2270279 | 0.6766274 | 0.0090538 |
| 1444521_at   | NA            | NA                                                                | 17.7001096  | 25.1096886  | 0.7049116 | 0.0090701 |
| 1442484_at   | D9Erdt306e    | DNA segment, Chr 9, ERATO Doi 306, expressed in embryonic rat 306 | 7.8273365   | 4.7409736   | 1.6509977 | 0.0090962 |
| 1425156_at   | Gbp6          | guanlylate binding protein 6                                      | 53.9518616  | 79.6412123  | 0.6774365 | 0.0091537 |
| 1437226_x_at | Marccksl1     | MARCKS-like 1                                                     | 4.7660352   | 3.2269474   | 1.4769485 | 0.0091656 |
| 1435287_at   | Add2          | adducin 2 (beta)                                                  | 47.1972936  | 28.0354951  | 1.6834835 | 0.0091967 |
| 1442536_at   | 6430590A07Rik | RIKEN cDNA 6430590A07 gene                                        | 11.3398892  | 16.5304441  | 0.6860003 | 0.0092109 |
| 1420369_a_at | Csn2          | casein beta                                                       | 279.5322389 | 35.1118063  | 7.9612036 | 0.009305  |
| 1435902_at   | Nudt18        | nudix (nucleoside diphosphate linked moiety X)-like 18            | 38.3695625  | 58.1413007  | 0.6599364 | 0.0094194 |
| 1452203_at   | Obfc2a        | oligonucleotide/oligosaccharide-binding factor 2a                 | 28.8775368  | 18.9828877  | 1.5212405 | 0.009517  |
| 1437359_at   | Rnps1         | ribonucleic acid binding protein S1                               | 22.8379419  | 13.6436213  | 1.6738915 | 0.0095718 |
| 1433978_at   | 4930430F08Rik | RIKEN cDNA 4930430F08 gene                                        | 20.2376544  | 35.4957003  | 0.5701438 | 0.0096177 |
| 1460290_at   | Lpin2         | lipin 2                                                           | 10.0973402  | 16.4368112  | 0.6143126 | 0.0096589 |
| 1418966_a_at | Dcbld1        | discoidin, CUB and LCCL domain containing protein 1               | 9.0282857   | 5.1382123   | 1.7570869 | 0.0097065 |
| 1422865_at   | Runx1         | runt related transcription factor 1                               | 35.7910962  | 62.4239147  | 0.5733555 | 0.0098625 |
| 1434949_at   | Armc8         | armadillo repeat containing 8                                     | 11.9293039  | 8.4862202   | 1.4057264 | 0.0103235 |
| 1425814_a_at | Calcrl        | calcitonin receptor-like receptor 1                               | 20.7167251  | 8.9345731   | 2.3187146 | 0.0104016 |
| 1442054_at   | NA            | NA                                                                | 12.1274261  | 8.0586842   | 1.5048891 | 0.0104757 |
| 1425711_a_at | Akt1          | thymoma viral proto-oncogene 1                                    | 19.1692627  | 10.6993313  | 1.7916378 | 0.0106937 |
| 1424999_at   | 1700022C21Rik | RIKEN cDNA 1700022C21 gene                                        | 3.0957739   | 4.9773874   | 0.6219676 | 0.0107144 |
| 1420136_a_at | NA            | NA                                                                | 12.5652673  | 8.3345549   | 1.5076111 | 0.0107535 |
| 1418835_at   | Phlda1        | pleckstrin homology-like domain, family A member 1                | 26.9420444  | 7.5972159   | 3.5463049 | 0.0107831 |
| 1449601_x_at | NA            | NA                                                                | 2.7144867   | 4.0915294   | 0.6634406 | 0.0109039 |
| 1437884_at   | Arl5b         | ADP-ribosylation factor-like 5B                                   | 13.7119219  | 5.9579105   | 2.3014649 | 0.0110006 |
| 1424456_at   | Pvrl2         | poliovirus receptor-related 2                                     | 19.4875853  | 11.0246934  | 1.7676306 | 0.0110014 |
| 1422670_at   | Rnd2          | Rho family GTPase 2                                               | 70.8885271  | 41.2240511  | 1.7195915 | 0.0111926 |
| 1459253_at   | Arddc3        | arrestin domain containing 3                                      | 7.3439933   | 4.5253757   | 1.6228472 | 0.0112446 |
| 1450129_a_at | Socs6         | suppressor of cytokine signaling 6                                | 23.7305771  | 14.570514   | 1.6286712 | 0.0113177 |
| 1441807_s_at | NA            | NA                                                                | 2.4173722   | 4.1138182   | 0.5876225 | 0.0115103 |
| 1435303_at   | Taf4b         | TAF4B RNA polymerase II, TATA box binding protein subunit 4       | 22.1235893  | 14.3414949  | 1.5426278 | 0.0117033 |
| 1434129_s_at | Lhfp12        | lipoma HMGIC fusion partner-like 2                                | 7.2241533   | 15.2062081  | 0.4750792 | 0.0117135 |
| 1446543_at   | Gcn1l1        | GCN1 general control of amino-acid synthetase like 1              | 10.1570536  | 6.8714877   | 1.4781448 | 0.0117938 |
| 1457638_x_at | Rfc2          | replication factor C (activator 1) 2                              | 21.4652224  | 31.1613565  | 0.6888411 | 0.0118213 |
| 1421811_at   | Thbs1         | thrombospondin 1                                                  | 1.9196377   | 18.21159    | 0.1054075 | 0.0118366 |
| 1425569_a_at | Slamf1        | signaling lymphocytic activation molecule 7                       | 2.7349784   | 4.4163257   | 0.6192882 | 0.0121023 |
| 1437210_a_at | Brd2          | bromodomain containing 2                                          | 90.8337638  | 65.4002719  | 1.3888897 | 0.0123962 |
| 1428644_at   | Mgat5         | mannoside acetylglucosaminyltransferase 5                         | 5.3591311   | 11.2619954  | 0.4755288 | 0.0125128 |
| 1440351_at   | NA            | NA                                                                | 4.926884    | 3.5249196   | 1.3977295 | 0.0127131 |
| 1418865_at   | Zfp385a       | zinc finger protein 385A                                          | 9.1224784   | 13.277501   | 0.6870629 | 0.0128198 |
| 1437348_at   | Fbxo28        | F-box protein 28                                                  | 27.7637629  | 19.0723608  | 1.4557067 | 0.0128539 |
| 1457294_at   | Tmtc3         | transmembrane and tetratricopeptide repeat containing protein 3   | 11.0973738  | 15.3179055  | 0.7244707 | 0.0128901 |
| 1435415_x_at | Marccksl1     | MARCKS-like 1                                                     | 4.6629047   | 3.3472565   | 1.3930527 | 0.0131106 |
| 1429612_at   | Eml4          | echinoderm microtubule associated protein 4                       | 41.7360138  | 29.6047121  | 1.409776  | 0.0131348 |
| 1451428_x_at | Egfl7         | EGF-like domain 7                                                 | 96.2564875  | 59.6896766  | 1.6126153 | 0.0134032 |
| 1443950_at   | Hmgbx3        | HMG box domain containing 3                                       | 17.2066251  | 10.9372342  | 1.5732154 | 0.0134593 |
| 1438247_at   | Klhl15        | kelch-like 15 (Drosophila)                                        | 10.9865872  | 4.1037914   | 2.6771798 | 0.0135368 |
| 1417191_at   | Dnajb9        | Dnaj (Hsp40) homolog, subfamily B, member 9                       | 44.1684008  | 23.3812178  | 1.8890548 | 0.0135493 |
| 1430516_at   | 4930428B01Rik | RIKEN cDNA 4930428B01 gene                                        | 9.8362772   | 6.903033    | 1.4249211 | 0.0140198 |
| 1437122_at   | Bcl2          | B-cell leukemia/lymphoma 2                                        | 5.9568866   | 9.7647742   | 0.6100383 | 0.0140361 |
| 1456537_at   | A930033H14Rik | RIKEN cDNA A930033H14 gene                                        | 5.4020187   | 2.9009061   | 1.8621832 | 0.0141935 |
| 1445379_at   | NA            | NA                                                                | 2.9727232   | 1.9769381   | 1.5037008 | 0.0142602 |
| 1429400_at   | Clcn5         | chloride channel 5                                                | 22.7215757  | 15.6124689  | 1.453348  | 0.0143051 |
| 1451427_a_at | Egfl7         | EGF-like domain 7                                                 | 79.6511762  | 51.4422701  | 1.5483604 | 0.0144544 |
| 1458609_at   | NA            | NA                                                                | 5.6666361   | 8.2880381   | 0.6837126 | 0.0145545 |
| 1451464_at   | Mfap3         | microfibrillar-associated protein 3                               | 7.2056894   | 4.9037716   | 1.4694178 | 0.0147885 |
| 1443621_at   | Xaf1          | XIAP associated factor 1                                          | 3.4175219   | 11.9763657  | 0.2853555 | 0.0149247 |
| 1434918_at   | Sox6          | SRY-box containing gene 6                                         | 15.7509667  | 26.3476275  | 0.5978135 | 0.0149606 |
| 1447993_a_at | Snhg10        | small nucleolar RNA host gene (non-protein coding)                | 88.2313761  | 123.1438894 | 0.7164901 | 0.0150559 |
| 1431597_a_at | Nrip3         | nuclear receptor interacting protein 3                            | 5.3570723   | 11.5083975  | 0.4654925 | 0.0151741 |
| 1457586_at   | NA            | NA                                                                | 12.0557692  | 8.2124346   | 1.4679897 | 0.0152193 |
| 1424173_at   | Tmem48        | transmembrane protein 48                                          | 4.8584235   | 3.3995138   | 1.4291525 | 0.0152826 |
| 1417133_at   | Pmp22         | peripheral myelin protein 22                                      | 56.281357   | 17.3982004  | 3.2348953 | 0.0156322 |
| 1452836_at   | Lpin2         | lipin 2                                                           | 114.0011319 | 163.6081114 | 0.6967939 | 0.0157013 |
| 1417848_at   | Zfp704        | zinc finger protein 704                                           | 25.5675221  | 39.3626164  | 0.6495382 | 0.0158003 |
| 1428122_s_at | Fam125b       | family with sequence similarity 125, member B                     | 35.5434464  | 58.8311499  | 0.6041603 | 0.016194  |
| 1435579_at   | NA            | NA                                                                | 16.8995603  | 34.7628833  | 0.4861381 | 0.0162653 |
| 1456164_at   | AW011738      | expressed sequence AW011738                                       | 2.8957751   | 4.5591743   | 0.6351534 | 0.0166305 |
| 1424344_s_at | Eif1a         | eukaryotic translation initiation factor 1A                       | 117.17393   | 71.7780981  | 1.6324468 | 0.0166322 |
| 1427677_a_at | Sox6          | SRY-box containing gene 6                                         | 8.8841723   | 16.7732095  | 0.5296644 | 0.0166396 |
| 1442083_at   | Rsrc2         | arginine/serine-rich coiled-coil 2                                | 55.3892716  | 39.045757   | 1.4185734 | 0.0167054 |
| 1425570_at   | Slamf1        | signaling lymphocytic activation molecule 7                       | 8.029737    | 14.6916122  | 0.5465525 | 0.0167298 |
| 1425288_at   | Samd11        | sterile alpha motif domain containing 11                          | 37.0310501  | 63.1870345  | 0.5860546 | 0.0167959 |
| 1455509_at   | AB182283      | cDNA sequence AB182283                                            | 5.6529587   | 9.5087811   | 0.5944988 | 0.0168801 |
| 1423635_at   | Bmp2          | bone morphogenetic protein 2                                      | 64.5047699  | 18.5554457  | 3.4763256 | 0.0168117 |
| 1443949_at   | NA            | NA                                                                | 15.1195463  | 9.4961554   | 1.5921755 | 0.0171337 |
| 1417902_at   | Slc19a2       | solute carrier family 19 (thiamine transporter) member 2          | 43.7309704  | 27.8198369  | 1.5719348 | 0.0172257 |
| 1440488_at   | NA            | NA                                                                | 4.7039435   | 2.3195342   | 2.027969  | 0.0176321 |
| 1444530_at   | NA            | NA                                                                | 18.8296865  | 31.5109385  | 0.5975603 | 0.0178067 |
| 1437546_at   | Ormdl2        | ORM1-like 2 (S. cerevisiae)                                       | 21.1065603  | 32.3643062  | 0.6521555 | 0.0178627 |
| 1441962_at   | Alox5         | arachidonate 5-lipoxygenase                                       | 58.7171585  | 89.8526308  | 0.6534829 | 0.018044  |
| 1450814_a_at | Ipo4          | importin 4                                                        | 95.4597315  | 67.0705996  | 1.4232724 | 0.0183818 |
| 1428985_at   | Ints12        | integrator complex subunit 12                                     | 21.2116931  | 32.0857692  | 0.6610935 | 0.0186582 |
| 1448272_at   | Blg2          | B-cell translocation gene 2, anti-proliferative                   | 17.7675943  | 26.452965   | 0.6716674 | 0.0190907 |
| 1424988_at   | Mylip         | myosin regulatory light chain interacting protein                 | 28.2957054  | 51.5081123  | 0.5493446 | 0.0190551 |
| 1444872_at   | D3Erdt740e    | DNA segment, Chr 3, ERATO Doi 740, expressed in embryonic rat 740 | 12.6736166  | 6.8556443   | 1.8486398 | 0.0191507 |
| 1457628_at   | Ccdc53        | coiled-coil domain containing 53                                  | 15.6916654  | 9.5195467   | 1.6483627 | 0.0196148 |
| 1423054_at   | Wdr1          | WD repeat domain 1                                                | 54.7554429  | 38.4080649  | 1.4256236 | 0.0196688 |
| 1440463_at   | NA            | NA                                                                | 2.7612532   | 1.9539323   | 1.4131776 | 0.0197281 |
| 1457673_at   | 6820431F20Rik | RIKEN cDNA 6820431F20 gene                                        | 5.4253913   | 9.1052292   | 0.5958544 | 0.0199631 |
| 1423272_at   | Polg          | polymerase (DNA directed), gamma                                  | 67.4365806  | 49.4275019  | 1.3643534 | 0.0200549 |
| 1437171_x_at | Gsn           | gelsolin                                                          | 1.9285057   | 3.0404515   | 0.6342827 | 0.020133  |
| 1418561_at   | Sf3b1         | splicing factor 3b, subunit 1                                     | 46.193861   | 27.9628401  | 1.6519731 | 0.0203249 |
| 1422557_s_at | Mt1           | metallothionein 1                                                 | 2452.191184 | 1761.080521 | 1.3924356 | 0.0203505 |
| 1424609_a_at | 100039204     | predicted gene, 100039204                                         | 118.9478237 | 161.519535  | 0.73643   | 0.0204549 |
| 1450710_at   | Jarid2        | jumonji, AT rich interactive domain 2                             | 48.236216   | 23.3666127  | 2.0643221 | 0.0206067 |
| 1447279_at   | NA            | NA                                                                | 8.6668191   | 5.6630875   | 1.5304053 | 0.0206357 |
| 1435267_at   | A430108E01Rik | RIKEN cDNA A430108E01 gene                                        | 56.9702994  | 39.2894379  | 1.4500317 | 0.0207078 |

|              |               |                                            |             |             |           |           |
|--------------|---------------|--------------------------------------------|-------------|-------------|-----------|-----------|
| 1416268_at   | Ets2          | E26 avian leukemia oncogene 2, 3@#568      | 32.5667786  | 20.7730483  | 1.5677419 | 0.020946  |
| 1436357_at   | NA            | NA                                         | 44.690644   | 62.8203064  | 0.7114044 | 0.0209947 |
| 1457933_at   | Gm1964        | gene model 1964, (NCBI)                    | 19.7802537  | 31.2554753  | 0.6282872 | 0.0210062 |
| 1437475_at   | BC028454      | cDNA sequence BC028454                     | 24.9292471  | 34.3771163  | 0.7351698 | 0.0212006 |
| 1430857_s_at | Pex11c        | peroxisomal biogenesis factor 11 gamma     | 8.4115844   | 12.223242   | 0.6881641 | 0.0212611 |
| 1437446_at   | Rab5b         | RAB5B, member RAS oncogene family          | 2.701556    | 3.7397606   | 0.7223874 | 0.0213117 |
| 1459791_at   | Dnajc1        | Dnal (Hsp40) homolog, subfamily C, mem     | 3.5057295   | 2.4969825   | 1.4039864 | 0.0213183 |
| 1439036_a_at | Atp1b1        | ATPase, Na+/K+ transporting, beta 1 poly   | 76.3574787  | 20.4607262  | 3.7319046 | 0.0213811 |
| 1428858_at   | Wdr70         | WD repeat domain 70                        | 48.0858855  | 31.4878987  | 1.5271227 | 0.0214649 |
| 1449815_a_at | Ssbp2         | single-stranded DNA binding protein 2      | 150.2421893 | 215.1958541 | 0.6981928 | 0.0217788 |
| 1425107_a_at | Lifr          | leukemia inhibitory factor receptor        | 9.9050859   | 7.2070346   | 1.3743636 | 0.0219752 |
| 1418823_at   | Arf6          | ADP-ribosylation factor 6                  | 206.831997  | 147.2145791 | 1.4049695 | 0.0220061 |
| 1446316_at   | Lpin2         | lipin 2                                    | 3.5144709   | 6.4122958   | 0.5480831 | 0.0222041 |
| 1418929_at   | Iift57        | intraflagellar transport 57 homolog (Chla  | 60.7942222  | 94.1203247  | 0.6459202 | 0.0222044 |
| 1457532_at   | NA            | NA                                         | 7.2707325   | 4.6711245   | 1.5565272 | 0.0222467 |
| 1435823_x_at | Egfl7         | EGF-like domain 7                          | 44.338962   | 28.7698702  | 1.5411596 | 0.0222892 |
| 1452249_at   | Prickle1      | prickle like 1 (Drosophila)                | 21.867769   | 14.4320792  | 1.5152196 | 0.0223069 |
| 1424468_s_at | Phldb1        | pleckstrin homology-like domain, family B  | 21.3857396  | 34.6591479  | 0.6170302 | 0.0228486 |
| 1452240_at   | Bruno4        | bruno-like 4, RNA binding protein (Droso   | 33.8240836  | 51.3169946  | 0.6591205 | 0.0231103 |
| 1438328_at   | Hcfc2         | host cell factor C2                        | 4.9996279   | 8.3360502   | 0.5997598 | 0.0232102 |
| 1451739_at   | Klf5          | Kruppel-like factor 5                      | 5.2893908   | 3.4498885   | 1.5332063 | 0.0232792 |
| 1445938_at   | S930427L02Rik | RIKEN cDNA S930427L02 gene                 | 17.1228129  | 26.2353769  | 0.6526612 | 0.0232932 |
| 1434010_at   | Fam117b       | family with sequence similarity 117, mem   | 70.3074804  | 42.112972   | 1.669497  | 0.0232981 |
| 1416593_at   | Glxr          | glutaredoxin                               | 42.7600228  | 67.3185855  | 0.635189  | 0.0233716 |
| 1428347_at   | Cyfp2         | cytoplasmic FMR1 interacting protein 2     | 1.6589744   | 2.7390249   | 0.6056806 | 0.0235157 |
| 1426670_at   | Agri          | agri                                       | 15.7708219  | 22.1113374  | 0.713246  | 0.0236385 |
| 1428750_at   | Cdc42ep2      | CDC42 effector protein (Rho GTPase bind    | 6.1946077   | 9.384066    | 0.6601198 | 0.0239823 |
| 1453384_at   | Dennd1b       | DENN/MADD domain containing 1B             | 7.7877827   | 5.8048796   | 1.3415925 | 0.023984  |
| 1444744_at   | NA            | NA                                         | 7.8759344   | 11.243469   | 0.7004897 | 0.024297  |
| 1446365_at   | Vti1a         | vesicle transport through interaction with | 11.4506888  | 7.7933195   | 1.4692954 | 0.0243036 |
| 1457360_at   | NA            | NA                                         | 12.3790121  | 8.2191934   | 1.5061103 | 0.0246711 |
| 1415892_at   | Sgpl1         | sphingosine phosphate lyase 1              | 10.8135857  | 6.183287    | 1.748841  | 0.0247556 |
| 1453104_at   | Mapk1         | mitogen-activated protein kinase 1         | 162.9304119 | 120.7971122 | 1.3487939 | 0.0249411 |
| 1434486_x_at | Ugp2          | UDP-glucose pyrophosphorylase 2            | 45.9632366  | 30.2888541  | 1.5174967 | 0.0251203 |
| 1452903_at   | 6230427J02Rik | RIKEN cDNA 6230427J02 gene                 | 35.2616014  | 56.3409429  | 0.625861  | 0.0252612 |
| 1452160_at   | Tiparp        | TCDD-inducible poly(ADP-ribose) polymer    | 11.7490335  | 6.8106217   | 1.7251044 | 0.0258298 |
| 1436985_at   | Zfp644        | zinc finger protein 644                    | 21.3768105  | 13.4271928  | 1.5920536 | 0.0261219 |
| 1425422_a_at | Parn          | poly(A)-specific ribonuclease (deadenyla   | 37.4679793  | 26.2999227  | 1.4246422 | 0.0266455 |
| 1417953_at   | Fam3c         | family with sequence similarity 3, membe   | 117.3825115 | 240.5717024 | 0.4879315 | 0.0270451 |
| 1443818_at   | NA            | NA                                         | 9.3696515   | 6.7844352   | 1.3810511 | 0.0270755 |
| 1434397_at   | Zdhc17        | zinc finger, DHHC domain containing 17     | 35.9550029  | 48.0411112  | 0.7484216 | 0.0273226 |
| 1434272_at   | Cpeb2         | cytoplasmic polyadenylation element bin    | 8.3538679   | 5.1194201   | 1.6317996 | 0.0277829 |
| 1426929_at   | Bruno4        | bruno-like 4, RNA binding protein (Droso   | 59.1847811  | 83.6285903  | 0.7077099 | 0.0279648 |
| 1447995_x_at | Snhg10        | small nucleolar RNA host gene (non-prote   | 45.844053   | 62.9116481  | 0.7287053 | 0.0280807 |
| 1423368_at   | Laptm4a       | lysosomal-associated protein transmembr    | 263.6783304 | 368.203179  | 0.7161218 | 0.0281086 |
| 1437079_at   | Scl18a2       | solute carrier family 18 (vesicular monoa  | 5.028659    | 7.0612345   | 0.7121501 | 0.0282289 |
| 1453474_at   | 1300007F04Rik | RIKEN cDNA 1300007F04 gene                 | 2.030361    | 2.8099849   | 0.7225523 | 0.0287682 |
| 1442404_at   | NA            | NA                                         | 7.8762376   | 4.9342186   | 1.5962482 | 0.0288276 |
| 1435505_at   | Dmwd          | dystrophia myotonica-containing WD rep     | 22.9521084  | 14.3433887  | 1.6001873 | 0.0288431 |
| 1420831_at   | Qsox1         | quiescin Q6 sulfhydryl oxidase 1           | 26.6985047  | 15.3879845  | 1.7350228 | 0.0290725 |
| 1437208_at   | Sept10        | septin 10                                  | 13.7607575  | 9.4275954   | 1.4596254 | 0.0291051 |
| 1426310_at   | Zdhc5         | zinc finger, DHHC domain containing 5      | 15.1024104  | 9.4296303   | 1.6015909 | 0.0292583 |
| 1455352_at   | 2610101N10Rik | RIKEN cDNA 2610101N10 gene                 | 49.9862557  | 32.3188866  | 1.5466577 | 0.029359  |
| 1439154_at   | Nup98         | nucleoporin 98                             | 54.6883417  | 36.4506925  | 1.5003375 | 0.0294403 |
| 1455262_at   | Thsd4         | thrombospondin, type I, domain containi    | 7.9029171   | 11.7105165  | 0.6748564 | 0.0300692 |
| 1448743_at   | Ssx2ip        | synovial sarcoma, X breakpoint 2 interact  | 8.0277893   | 158.8571156 | 0.5066055 | 0.0303054 |
| 1436801_x_at | Cdc42ep4      | CDC42 effector protein (Rho GTPase bind    | 15.3720266  | 21.6833844  | 0.7089311 | 0.0305425 |
| 1456467_s_at | Nlk           | nemo like kinase                           | 32.0778589  | 55.7070678  | 0.575831  | 0.030617  |
| 1435970_at   | Nlk           | nemo like kinase                           | 128.9894793 | 203.8648123 | 0.6327207 | 0.0306687 |
| 1448184_at   | Fkbp1a        | FK506 binding protein 1a                   | 259.9676301 | 175.1761102 | 1.4840359 | 0.0308421 |
| 1429331_at   | 4632427E13Rik | RIKEN cDNA 4632427E13 gene                 | 3.0131782   | 4.1247918   | 0.7305043 | 0.0308854 |
| 1452514_a_at | Kit           | kit oncogene                               | 171.4344027 | 93.7045166  | 1.8295212 | 0.0312933 |
| 1432562_at   | 1110006G14Rik | RIKEN cDNA 1110006G14 gene                 | 5.8106071   | 7.9987402   | 0.7264403 | 0.0313424 |
| 1426123_a_at | Rrbp1         | ribosome binding protein 1                 | 34.2041986  | 24.446052   | 1.3991707 | 0.0314373 |
| 1437490_x_at | Uap1          | UDP-N-acetylglucosamine pyrophosphory      | 6.032676    | 26.1588823  | 1.3774547 | 0.0315981 |
| 1435302_at   | Taf4b         | TAF4B RNA polymerase II, TATA box bind     | 20.7523786  | 15.4944184  | 1.3393454 | 0.0319623 |
| 1451612_at   | Mt1           | metallothionein 1                          | 18.4299982  | 6.8186824   | 2.702868  | 0.0321127 |
| 1457964_at   | 1810044D09Rik | RIKEN cDNA 1810044D09 gene                 | 11.9147577  | 19.4969673  | 0.6111083 | 0.0321866 |
| 1457669_x_at | Rfc2          | replication factor C (activator 1) 2       | 49.6920039  | 65.6276883  | 0.7571805 | 0.0322027 |
| 1416859_at   | Fkbp3         | FK506 binding protein 3                    | 210.4371808 | 156.4576625 | 1.3450104 | 0.0326952 |
| 1452477_at   | 100039027     | predicted gene, 100039027                  | 5.112944    | 7.0907535   | 0.721072  | 0.0329822 |
| 1423596_at   | Nek6          | NIMA (never in mitosis gene a)-related ex  | 40.0879662  | 20.7261936  | 1.9341692 | 0.0336589 |
| 1429469_at   | A930013F10Rik | RIKEN cDNA A930013F10 gene                 | 15.0246955  | 11.5273081  | 1.3034002 | 0.0338552 |
| 1434684_at   | Rin3          | Ras and Rab interactor 3                   | 6.2666456   | 13.1574598  | 0.4762808 | 0.0339486 |
| 1435627_x_at | Marcks1       | MARCKS-like 1                              | 3.5296823   | 2.5458262   | 1.3864585 | 0.0341207 |
| 1443512_at   | NA            | NA                                         | 15.3790599  | 9.322941    | 1.6495932 | 0.0342036 |
| 1455900_x_at | Tgm2          | transglutaminase 2, C polypeptide          | 28.2974075  | 16.9776189  | 1.6667477 | 0.0348915 |
| 1436871_at   | Sfrs7         | splicing factor, arginine/serine-rich 7    | 40.6706738  | 26.5684253  | 1.5307898 | 0.0349568 |
| 1456790_at   | Zfp800        | zinc finger protein 800                    | 38.4914889  | 28.5685881  | 1.3473361 | 0.0349646 |
| 1437375_at   | NA            | NA                                         | 3.6994385   | 2.5788764   | 1.4345157 | 0.0351034 |
| 1449418_s_at | Fbxo36        | F-box protein 36                           | 13.3041547  | 17.739924   | 0.7499556 | 0.0356031 |
| 1420407_at   | Ltb4r1        | leukotriene B4 receptor 1                  | 7.0194      | 9.5698364   | 0.7334922 | 0.0361739 |
| 1455166_at   | Arl5b         | ADP-ribosylation factor-like 5B            | 69.3296605  | 32.9562129  | 2.1036902 | 0.036218  |
| 1434315_at   | Npal3         | NIPA-like domain containing 3              | 17.7574524  | 24.4378726  | 0.7266366 | 0.0363168 |
| 1428875_at   | Golim4        | golgi integral membrane protein 4          | 90.0929853  | 141.2035974 | 0.638036  | 0.036483  |
| 1429212_a_at | Lrtomt        | leucine rich transmembrane and O-methyl    | 4.1974399   | 6.4037688   | 0.655464  | 0.0368953 |
| 1460234_at   | Wdr81         | WD repeat domain 81                        | 34.7288615  | 44.9419838  | 0.7727487 | 0.0369419 |
| 1416657_at   | Akt1          | thymoma viral proto-oncogene 1             | 63.8952296  | 43.7140193  | 1.4616645 | 0.0371792 |
| 1451337_at   | Psmf1         | proteasome (prosome, macropain) inhibit    | 101.9577951 | 135.0166897 | 0.7551496 | 0.0381183 |
| 1418199_at   | Hemgn         | hemogen                                    | 167.027809  | 273.2778447 | 0.6112014 | 0.0384317 |
| 1426614_at   | Prkcbp1       | protein kinase C binding protein 1         | 132.5680516 | 177.5800622 | 0.7465255 | 0.0393299 |
| 1452363_a_at | Atp2a2        | ATPase, Ca++ transporting, cardiac muscl   | 23.8261131  | 18.6824201  | 1.2753226 | 0.0395898 |
| 1443325_at   | NA            | NA                                         | 15.1012748  | 10.1045498  | 1.4945025 | 0.0396433 |
| 1423105_a_at | Yeats4        | YEATS domain containing 4                  | 178.6640212 | 139.2470655 | 1.2830721 | 0.039818  |
| 1425333_at   | Rab43         | RAB43, member RAS oncogene family          | 12.4482108  | 16.2354529  | 0.7667301 | 0.0398228 |
| 1434762_at   | Orai2         | ORAI calcium release-activated calcium m   | 23.0334195  | 30.4011049  | 0.7576507 | 0.0399368 |
| 1415900_a_at | Kit           | kit oncogene                               | 5.6821374   | 4.1344976   | 1.3743236 | 0.0402396 |
| 1455700_at   | Mterfd3       | MTERF domain containing 3                  | 36.2789079  | 55.2396756  | 0.6567545 | 0.0403981 |
| 1433490_s_at | Epb4.112      | erythrocyte protein band 4.1-like 2        | 17.9334637  | 11.6722482  | 1.536419  | 0.0407654 |
| 1435230_at   | Ankrd12       | ankyrin repeat domain 12                   | 25.6076387  | 39.0997192  | 0.6549315 | 0.041351  |
| 1419213_at   | Nat6          | N-acetyltransferase 6                      | 8.7414253   | 11.3418543  | 0.7707228 | 0.041355  |
| 1460151_at   | NA            | NA                                         | 6.3854888   | 10.055519   | 0.6350233 | 0.0419655 |
| 1453623_a_at | Rad23a        | RAD23a homolog (S. cerevisiae)             | 29.4601177  | 37.4122996  | 0.7874447 | 0.0423827 |
| 1422977_at   | Gp1bb         | glycoprotein Ib, beta polypeptide          | 1.9973118   | 6.3447957   | 0.3147953 | 0.0424268 |
| 1419166_at   | Slc5a2        | solute carrier family 5 (sodium/glucose co | 5.9185987   | 7.7252162   | 0.7661402 | 0.0426476 |
| 1430034_at   | Cct4          | chaperonin containing Tcp1, subunit 4 (de  | 11.6437646  | 7.4747519   | 1.557746  | 0.0426798 |
| 1436584_at   | Spry2         | sprouty homolog 2 (Drosophila)             | 8.2156388   | 5.2896294   | 1.5531596 | 0.0429457 |
| 1448995_at   | Pf4           | platelet factor 4                          | 20.4601716  | 72.3564457  | 0.2827692 | 0.0434412 |
| 1426782_at   | Gpr125        | G protein-coupled receptor 125             | 51.3128986  | 91.2201436  | 0.5625172 | 0.0439861 |
| 1454773_at   | Rxra          | retinoid X receptor alpha                  | 5.2808588   | 7.820118    | 0.6752914 | 0.0440175 |
| 1447436_at   | AI451250      | expressed sequence AI451250                | 3.8102924   | 5.5293396   | 0.6891044 | 0.0442128 |
| 1416592_at   | Glxr          | glutaredoxin                               | 55.5078916  | 79.4496152  | 0.6986553 | 0.0442661 |
| 1460207_s_at | E2f5          | E2F transcription factor 5                 | 18.9922134  | 14.0975501  | 1.3471996 | 0.0448957 |
| 1427866_x_at | NA            | NA                                         | 64.9408779  | 129.4166041 | 0.5017971 | 0.0451154 |
| 1428427_at   | Fbxl2         | F-box and leucine-rich repeat protein 2    | 3.8199262   | 5.4354389   | 0.7027816 | 0.0453265 |
| 1424852_at   | Mef2c         | myocyte enhancer factor 2C                 | 13.6082229  | 28.7130912  | 0.4739379 | 0.0453988 |

|              |               |                                              |             |             |           |           |
|--------------|---------------|----------------------------------------------|-------------|-------------|-----------|-----------|
| 1417623_at   | Slc12a2       | solute carrier family 12, member 2           | 32.2138774  | 23.3730083  | 1.3782512 | 0.0459561 |
| 1424268_at   | Smox          | spermine oxidase                             | 24.0654263  | 44.0071347  | 0.5468528 | 0.0461282 |
| 1436842_at   | B230380D07Rik | RIKEN cDNA B230380D07 gene                   | 48.2325094  | 62.3924687  | 0.7730502 | 0.0461986 |
| 1427912_at   | Cbr3          | carbonyl reductase 3                         | 2.4266259   | 5.5716811   | 0.4355285 | 0.046298  |
| 1422787_at   | Fkbp1         | FK506 binding protein-like                   | 10.9475914  | 14.3710896  | 0.7617788 | 0.0463083 |
| 1438429_at   | 2610319H10Rik | RIKEN cDNA 2610319H10 gene                   | 77.8240582  | 55.0749267  | 1.4130579 | 0.0465905 |
| 1434070_at   | Jag1          | jagged 1                                     | 10.8609924  | 7.6782564   | 1.4145129 | 0.0466278 |
| 1448595_a_at | Bex1          | brain expressed gene 1                       | 13.557661   | 33.0785731  | 0.4098623 | 0.0472091 |
| 1430079_at   | 5033406O09Rik | RIKEN cDNA 5033406O09 gene                   | 16.3460722  | 23.9069961  | 0.6837359 | 0.0472666 |
| 1422754_at   | Tmod1         | tropomodulin 1                               | 28.1485203  | 54.6831904  | 0.5147564 | 0.0472734 |
| 1444858_at   | NA            | NA                                           | 14.1250586  | 9.1463889   | 1.5443317 | 0.0473213 |
| 1452161_at   | Tiparp        | TCDD-inducible poly(ADP-ribose) polymerase 1 | 6.5924445   | 4.8530755   | 1.3584055 | 0.0475612 |
| 1416536_at   | Mum1          | melanoma associated antigen (mutated)        | 62.722743   | 48.4925799  | 1.2934503 | 0.0485906 |
| 1436216_s_at | 2610204M08Rik | RIKEN cDNA 2610204M08 gene                   | 20.9577707  | 33.6805316  | 0.6222518 | 0.0487001 |
| 1416250_at   | Btg2          | B-cell translocation gene 2, anti-proliferat | 39.6858575  | 60.6510833  | 0.6543306 | 0.0487506 |
| 1425099_a_at | Arnt1         | aryl hydrocarbon receptor nuclear transla    | 19.8706182  | 13.0207169  | 1.5260771 | 0.0487553 |
| 1451485_at   | 3300001P08Rik | RIKEN cDNA 3300001P08 gene                   | 244.1758187 | 350.6304193 | 0.6963909 | 0.049266  |
