# Supplementary material
Source: PubMed Central journal article supplement (PMC4423181)
Supplement: cdd2014186x10.pdf [file cdd2014186x10.pdf]

| GO Cluster | GO Category   | ID         | GO Term                              | Genes                                                                                                                                                                                      |
|------------|---------------|------------|--------------------------------------|--------------------------------------------------------------------------------------------------------------------------------------------------------------------------------------------|
| Cluster 1  | GOTERM_BP_FAT | GO:0016477 | Cell Migration                       | NRP1, PDGFB, PLXNA2, PAX6, ITGA11, FGF10, PAX3, PRKG1, TGFB2, OVOL2, LHX6, NR2F2, NKX2-3, RET, FLT1, LMX1B, MDGA1, ARID5B, BARHL2, EMX2, NR4A2, ITGA3, VAX1, ITGA6, ST14, SIX1, MNX1, PLAU |
| Cluster 2  | GOTERM_BP_FAT | GO:0016481 | Negative Regulation of Transcription | THRB, HELT, GLIS1, TBX20, CBX4, PAX5, CBX2, PAX3, SOX6, PAX2, CBX8, WT1, MSX3, SORBS3, HAND1, OVOL2, OVOL1, HOXA7, BHLHE41, NR2F2, DMBX1, MLXIPL, VAX1, DLX2, MAP3K10, TGIF1, ZFPM1        |
| Cluster 3  | GOTERM_BP_FAT | GO:0035113 | Embryonic Appendage Morphogenesis    | ALDH1A2, NOTCH2, FGF8, LMX1B, FGF9, HOXA11, FGF10, HOXA9, EN1, MECOM, ALX4                                                                                                                 |
| Cluster 4  | GOTERM_BP_FAT | GO:0048747 | Muscle Fiber Development             | CAV2, TNC, MYH11, MYOG, CACNB4, CACNA2D2, SNTA1                                                                                                                                            |
