# Supplementary material
Source: PubMed Central journal article supplement (PMC4423181)
Supplement: cdd2014186x11.pdf [file cdd2014186x11.pdf]

**Primer Name****Sequence**

|                    |                                                             |
|--------------------|-------------------------------------------------------------|
| SQ_Arid3c_001_10F  | aggaagagagGAATTTGGTTGGTGGGAGATATT                           |
| SQ_Arid3c_001_T7R  | cagtaatcgactcactatagggagaaggctAACACAAAAATCAAAAATCCAAAA      |
| SQ_Arid5b_001_10F  | aggaagagagTAGAGTGGGTTTGGTAGGTTAAAAA                         |
| SQ_Arid5b_001_T7R  | cagtaatcgactcactatagggagaaggctAACTTCTCCATATTCTAAATCAAAAAATA |
| SQ_Cd109_001_10F   | aggaagagagGGATGGGTGGAGTTATTAAGTTTTA                         |
| SQ_Cd109_001_T7R   | cagtaatcgactcactatagggagaaggctCAACACAAAAACCCTAAAAAAAACC     |
| SQ_Dbx1_001_10F    | aggaagagagATTTGGTTTTTGGAGTTTGAGTTTT                         |
| SQ_Dbx1_001_T7R    | cagtaatcgactcactatagggagaaggctATCAAAAAACCCTACAACCCT         |
| SQ_E13A19_001_10F  | aggaagagagGTAAGGTTTGTAGGTTGGTGGATTA                         |
| SQ_E13A19_001_T7R  | cagtaatcgactcactatagggagaaggctTCACAACAATCTAAAATCAATCCC      |
| SQ_H2afy2_001_10F  | aggaagagagGTGGGGTTTGATGAGTTATTGTTT                          |
| SQ_H2afy2_001_T7R  | cagtaatcgactcactatagggagaaggctCACATAATCTTCATCCACCAAAAA      |
| SQ_H1a_001_10F     | aggaagagagGGGGTTTTGTTTTTTATTTTTTTT                          |
| SQ_H1a_001_T7R     | cagtaatcgactcactatagggagaaggctCCCCAACAATCTTCTTAAATTTCTT     |
| SQ_Itga2_001_10F   | aggaagagagAATTTAAAGTGTTTTGGGGGTGTAT                         |
| SQ_Itga2_001_T7R   | cagtaatcgactcactatagggagaaggctTCCATAAATCTTAACTCCTTTTTCAA    |
| SQ_Itgb5_001_10F   | aggaagagagGGGTTGAGGAGGAGTTTTTTTT                            |
| SQ_Itgb5_001_T7R   | cagtaatcgactcactatagggagaaggctACCACTCCCAAATCTAAAACTAAA      |
| SQ_Klhl14_001_10F  | aggaagagagGGGGAGAGAGGAATAATAATTAAGGT                        |
| SQ_Klhl14_001_T7R  | cagtaatcgactcactatagggagaaggctAACAAAACCTCCAACACCAATTAAC     |
| SQ_Mecom_001_10F   | aggaagagagGAAAAGTTTTTAAGGTTGGGGTTT                          |
| SQ_Mecom_001_T7R   | cagtaatcgactcactatagggagaaggctTTTACCCTACTTAATTACCCAACA      |
| SQ_Meis2_001_10F   | aggaagagagAGAAATTTTAGGAGAGAGTAATTTGGA                       |
| SQ_Meis2_001_T7R   | cagtaatcgactcactatagggagaaggctACACACATCTTTAAATCCCAAAC       |
| SQ_Meis2_002_10F   | aggaagagagGGATAGGGGAGTTGTGGTATAAGTT                         |
| SQ_Meis2_002_T7R   | cagtaatcgactcactatagggagaaggctCATCATTCTATCACCCAAAATCTA      |
| SQ_Nid2_001_10F    | aggaagagagAGGTTTTGGGAGAAATATTTAGTGG                         |
| SQ_Nid2_001_T7R    | cagtaatcgactcactatagggagaaggctAACCTCAAAAATAACAAAACCCTC      |
| SQ_Rhoc_001_10F    | aggaagagagTGTGAGGTTAGTTTTTAGTTGAGGAT                        |
| SQ_Rhoc_001_T7R    | cagtaatcgactcactatagggagaaggctAAAACCTACCCACTCTCTTATCCAAA    |
| SQ_Rhoc_002_10F    | aggaagagagGGGGTTTTAGTTGGTGGGTG                              |
| SQ_Rhoc_002_T7R    | cagtaatcgactcactatagggagaaggctAAACCCTATTTCTTACTCCCTACCC     |
| SQ_Rnf208_001_10F  | aggaagagagTGAGTTAAGAGGTAAGGGAATTTTG                         |
| SQ_Rnf208_001_T7R  | cagtaatcgactcactatagggagaaggctCAAAAATTATCTCAAAAACAAACCC     |
| SQ_Runx1t1_001_10F | aggaagagagTTGGGTAAGATTTTGGTTTTTTGTA                         |
| SQ_Runx1t1_001_T7R | cagtaatcgactcactatagggagaaggctCTAATCCCAATTACTTCCCCTAAAA     |
| SQ_Slitk5_001_10F  | aggaagagagGATTGTAGGTTTGTGTTTGGGGATA                         |
| SQ_Slitk5_001_T7R  | cagtaatcgactcactatagggagaaggctCCCATCTACACTAAAAACAACCTTCTC   |
| SQ_Wnt9b_001_10F   | aggaagagagTTTAGGATGGGGATATAGAGGGTAT                         |
| SQ_Wnt9b_001_T7R   | cagtaatcgactcactatagggagaaggctAACTCAACCCTTTACTCAAATAAAC     |
