# Supplementary material
Source: PubMed Central journal article supplement (PMC4423181)

# Figure S 1

**a**

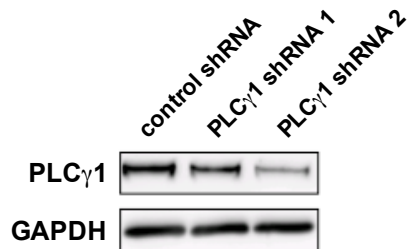

**b**

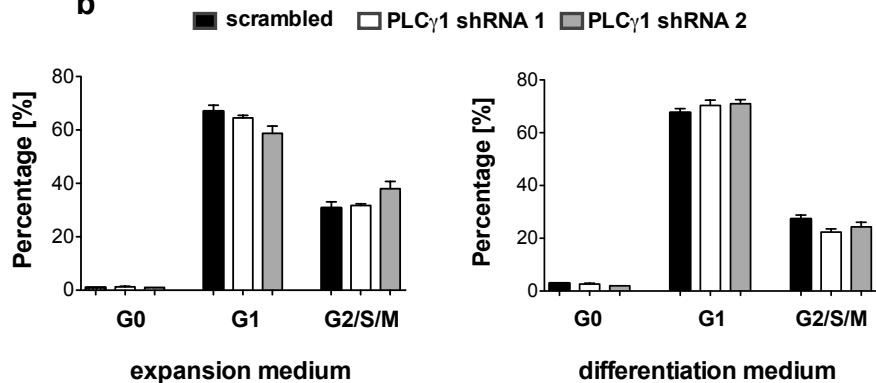

**c**

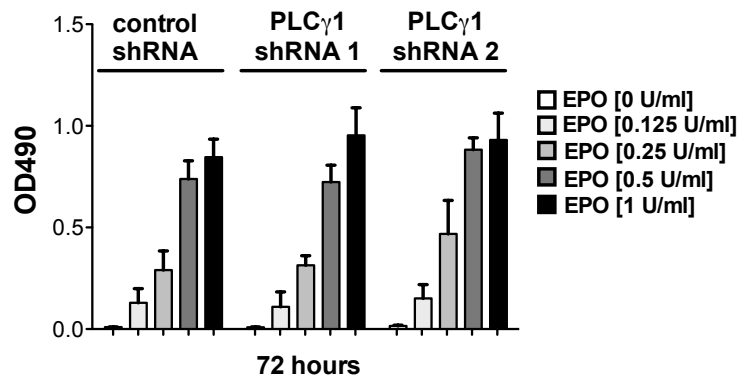

Supplement: cdd2014186x2.pdf [file cdd2014186x2.pdf]

# Figure S 2

a

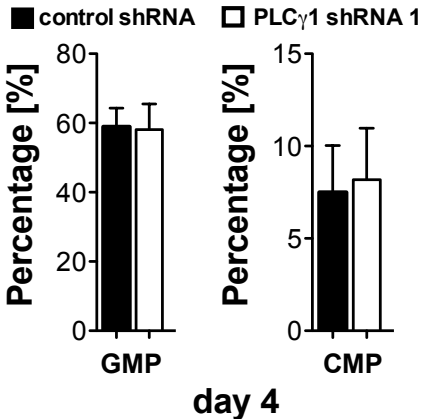

Supplement: cdd2014186x3.pdf [file cdd2014186x3.pdf]

# Figure S 3

a

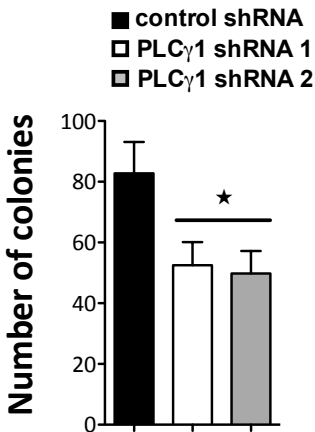

Supplement: cdd2014186x4.pdf [file cdd2014186x4.pdf]

# Figure S 4

a

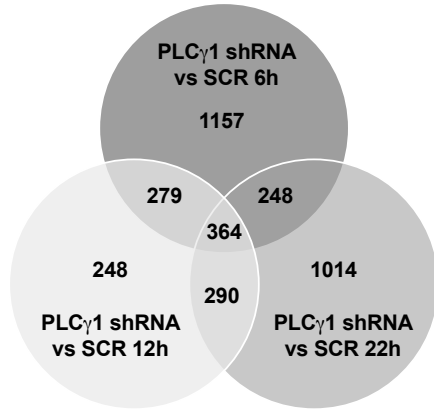

b

|     | CpG-island | CpG-island shore | Promoter | Other | Total DMR No. |
|-----|------------|------------------|----------|-------|---------------|
| 0h  | 265        | 103              | 41       | 786   | 1195          |
| 24h | 306        | 72               | 21       | 343   | 742           |

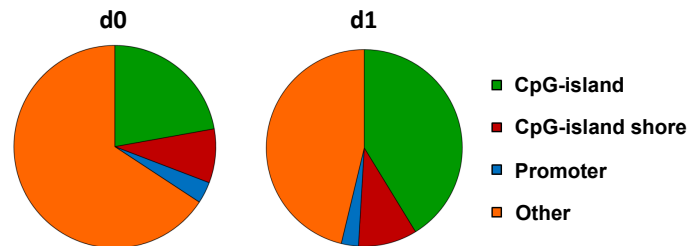

c

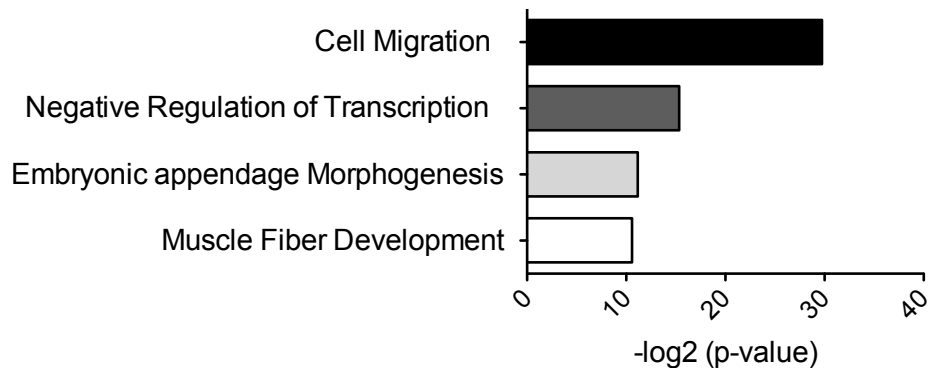

Supplement: cdd2014186x5.pdf [file cdd2014186x5.pdf]

# Figure S5

a

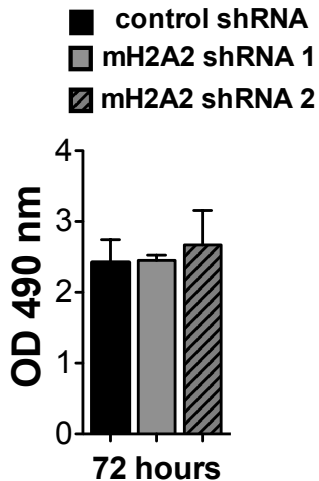

b

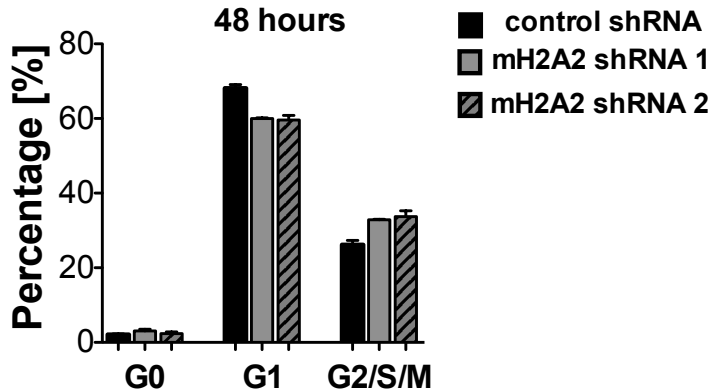

Supplement: cdd2014186x6.pdf [file cdd2014186x6.pdf]
